# Supplementary material for: Deep learning and taphonomy: high accuracy in the classification of cut marks made on fleshed and defleshed bones using convolutional neural networks
Source: Springer Nature journal article supplement (doi:10.1038/s41598-019-55439-6), 2019-12-12
Supplement: 41598_2019_55439_MOESM1_ESM.pdf [file 41598_2019_55439_MOESM1_ESM.pdf]

**Deep learning and taphonomy: high accuracy in the classification of cut marks made on fleshed and defleshed bones using convolutional neural networks.**

Gabriel Cifuentes-Alcobendas<sup>1</sup>, Manuel Domínguez-Rodrigo\*<sup>1</sup>

<sup>1</sup>IDEA (Institute of Evolution in Africa), University of Alcalá de Henares, Covarrubias 36, 28010 Madrid.

\*Corresponding author

**SUPPLEMENTARY INFORMATION**

**ADDITIONAL INFORMATION ABOUT THE METHOD AND SAMPLE USED**

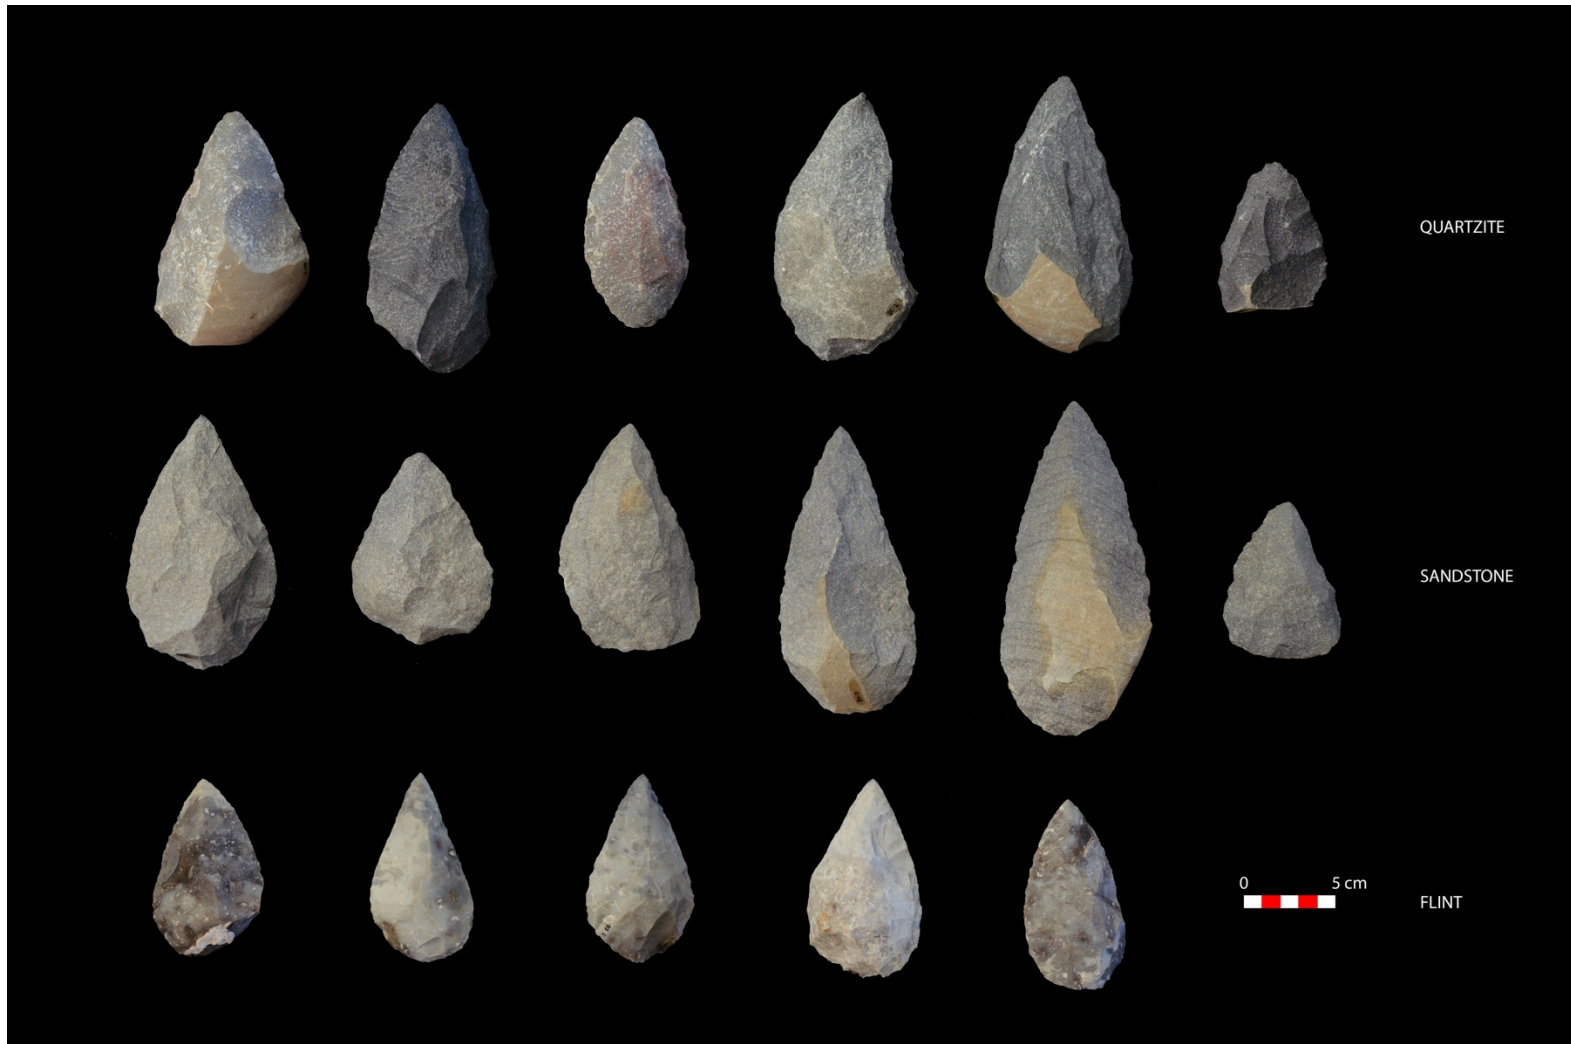

FIG S1. Types of handaxes used for both experiments (butchery and defleshed bones)

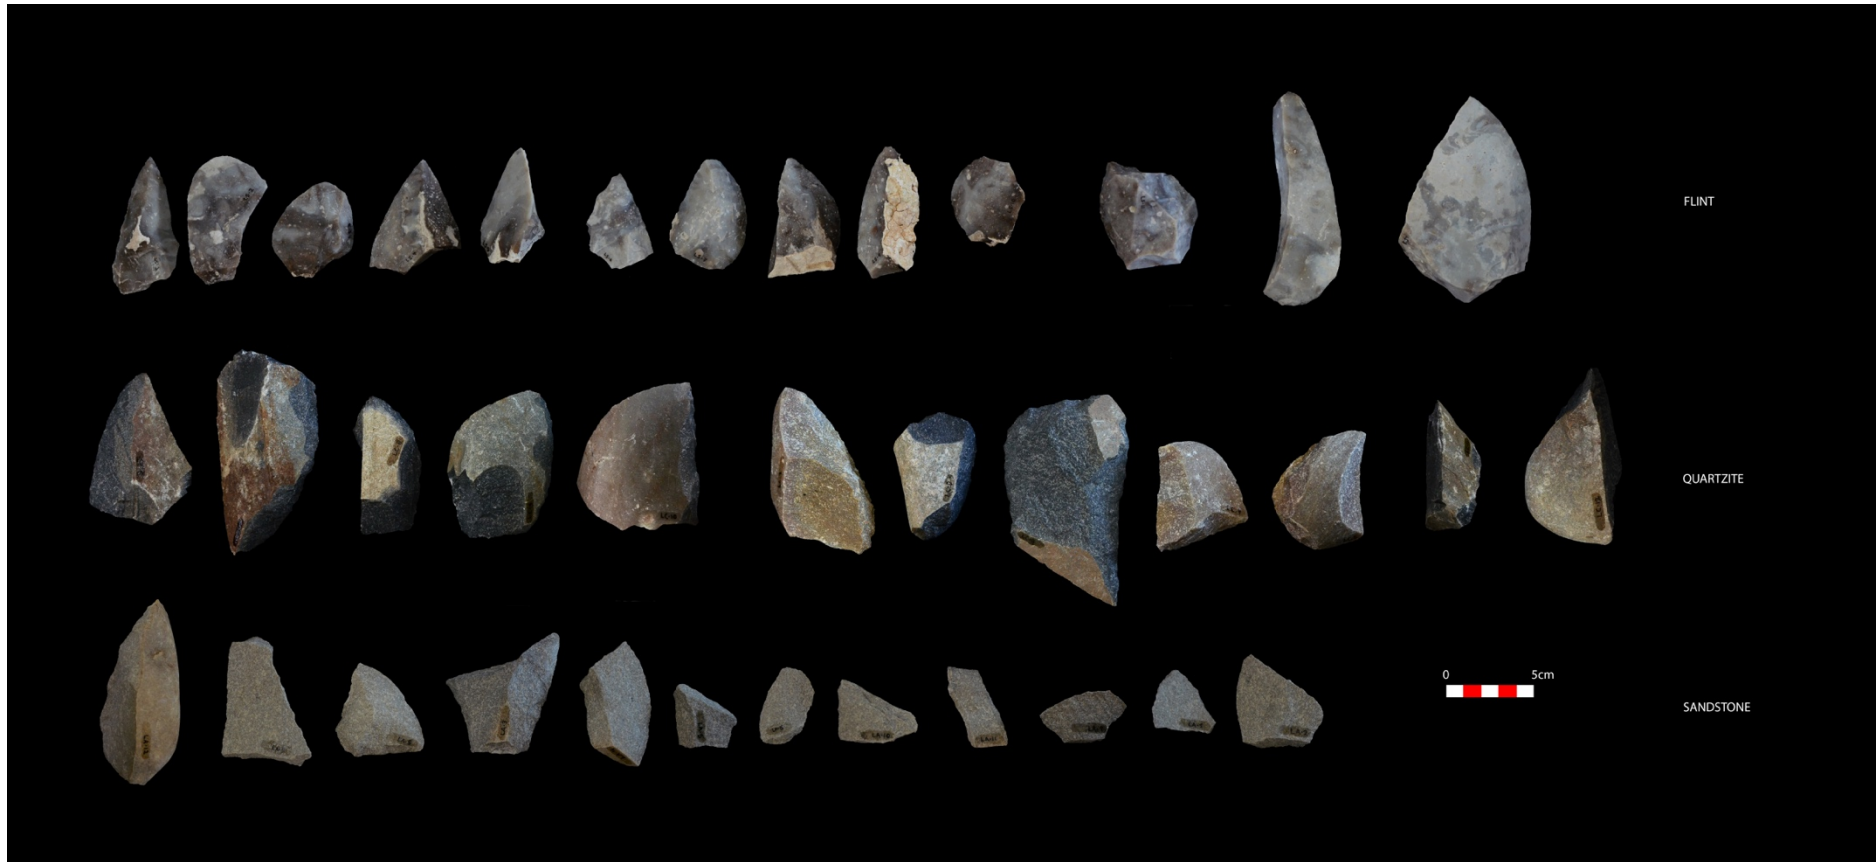

FIG S2. Types of flakes used for both experiments (butchery and defleshed bones)

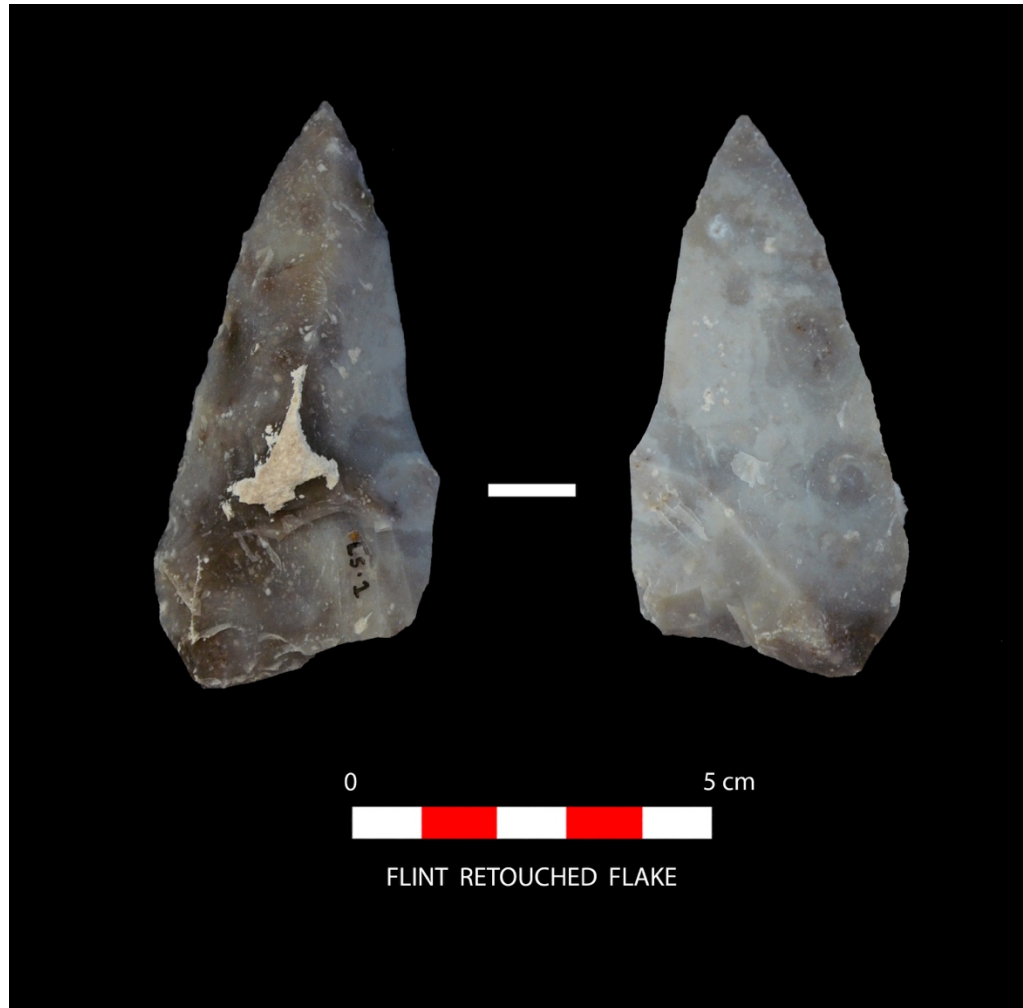

Fig. S3. Simple flake selected for the high-resolution experiment.

Table S1. Types of tools and raw materials used for each of the three experiments.

| LOW RESOLUTION               |           |    |
|------------------------------|-----------|----|
| Used tools                   |           |    |
| Handaxes                     | Chert     | 5  |
|                              | Quartzite | 6  |
|                              | Arenisca  | 6  |
| Retouched flakes             | Chert     | 13 |
|                              | Quartzite | 12 |
|                              | Sandstone | 12 |
| Cut marks on defleshed bones | 203       |    |
| Cut marks on bones with meat | 1087      |    |
| Total number of cut marks    | 1290      |    |

| MODERATE RESOLUTION          |           |   |
|------------------------------|-----------|---|
| Used tools                   |           |   |
| Retouched flakes             | Chert     | 2 |
|                              | Quartzite | 3 |
| Cut marks on defleshed bones | 101       |   |
| Cut marks on bones with meat | 132       |   |
| Total number of cut marks    | 233       |   |

| HIGH RESOLUTION              |       |   |
|------------------------------|-------|---|
| Used tools                   |       |   |
| Retouched flakes             | Chert | 1 |
| Cut marks on defleshed bones | 20    |   |
| Cut marks on bones with meat | 28    |   |
| Total number of cut marks    | 48    |   |
